# Supplementary material for: High-throughput AR dimerization assay identifies androgen disrupting chemicals and metabolites
Source: Front Toxicol. 2023 Apr 4;5:1134783. doi: 10.3389/ftox.2023.1134783 (PMC10112521; doi:10.3389/ftox.2023.1134783)
Supplement: Supplementary file 8 [file Table1.XLSX]

## Sheet: Supp_Table_Ref_Chems
Chemical	CASN	Vendor	Class	OT-tested	UPItt-tested	Agonist reference	Antagonist reference
17alpha-Estradiol	57-91-0	Sigma	drug (estrogen)	Yes	Yes	Inactive	na
17alpha-Ethinylestradiol	57-63-6	Sigma	drug (estrogen)	Yes	No
17beta-Estradiol	50-28-2	Sigma	drug (estrogen)	Yes	Yes
17beta-Trenbolone	10161-33-8	Sigma	drug (androgen)	Yes	No	Strong	na
17-Methyltestosterone	58-18-4	Sigma	drug (androgen)	Yes	Yes	Strong	Inactive
2,2',4,4'-Tetrahydroxybenzophenone	131-55-5	Sigma	cosmetic	Yes	Yes
2,4-Dihydroxybenzophenone	131-56-6	Sigma	cosmetic	Yes	Yes
2,4-Dinitrophenol	51-28-5	Sigma	pesticide	Yes	Yes
2-Ethylhexylparaben	5153-25-3	Santa Cruz Biotechnology	cosmetic	No	No
4-(1,1,3,3-Tetramethylbutyl)phenol	140-66-9	Sigma	industrial	Yes	Yes
4-(2-Methylbutan-2-yl)phenol	80-46-6	Sigma	industrial	Yes	Yes
4,4'-Sulfonyldiphenol	80-09-1	Sigma	industrial	Yes	Yes
4-Androstene-3,17-dione	63-05-8	Steroloids	drug (androgen)	Yes	Yes	Moderate	Inactive
4-Cumylphenol	599-64-4	Sigma	pesticide	Yes	Yes
4-Dodecylphenol	104-43-8	Chem Service	industrial	Yes	Yes
4-Hydroxybenzoic acid	99-96-7	Sigma	cosmetic	Yes	Yes
4-Nonylphenol	104-40-5	Sigma	industrial	Yes	Yes
4-tert-Butylphenol	98-54-4	Sigma	industrial	No	No
5alpha-Dihydrotestosterone	521-18-6	Sigma	drug (androgen)	Yes	Yes	Moderate	na
Abamectin	71751-41-2	Sigma	pesticide	Yes	Yes
Acephate	30560-19-1	Sigma	pesticide	Yes	Yes
Afimoxifene (4-Hydroxytamoxifen)	68392-35-8	Sigma	drug (anti-estrogen)	No	No
Amitrole	61-82-5	Sigma	pesticide	Yes	Yes
Anastrozole	120511-73-1	Sigma	drug (anti-aromatase)	Yes	Yes
Apigenin	520-36-5	Sigma	drug (anti-estrogen)	Yes	Yes
Atrazine	1912-24-9	Supelco	pesticide	Yes	Yes	Inactive	Inactive
Benfluralin	1861-40-1	Santa Cruz Biotechnology	pesticide	Yes	Yes
Benomyl	17804-35-2	Sigma	pesticide	Yes	Yes	Inactive	na
Bicalutamide	90357-06-5	Sigma	drug (anti-androgen)	Yes	Yes	na	Strong
Bifenthrin	82657-04-3	Sigma	pesticide	Yes	Yes
Bis(2-ethylhexyl)hexanedioate	103-23-1	Sigma	industrial	Yes	Yes
Bis(2-ethylhexyl)phthalate	117-81-7	Sigma	industrial	No	No
Bisphenol A	80-05-7	Acros	industrial	Yes	Yes	na	Moderate
Bisphenol AF	1478-61-1	Acros	industrial	Yes	Yes
Bisphenol B	77-40-7	International Laboratory	industrial	Yes	Yes
Butylbenzylphthalate	85-68-7	Sigma	industrial	No	No	Inactive	na
Butylparaben	94-26-8	Sigma	cosmetic	Yes	Yes
Carbendazim	10605-21-7	Sigma	pesticide	Yes	Yes	Inactive	na
Carbofuran	1563-66-2	Sigma	pesticide	Yes	Yes
Chlorothalonil	1897-45-6	Sigma	pesticide	Yes	Yes
Chlorpyrifos	2921-88-2	Chem Service	pesticide	Yes	Yes
Chlorpyrifos-methyl	5598-13-0	Sigma	pesticide	Yes	Yes
Clomiphene citrate	50-41-9	Sigma	drug (estrogen)	No	No
Corticosterone	50-22-6	Sigma	drug (cortisol)	Yes	Yes
Coumestrol	479-13-0	Sigma	drug (estrogen)	No	No
Cyfluthrin	68359-37-5	Sigma	pesticide	Yes	Yes	Inactive	na
Cypermethrin	52315-07-8	Sigma	pesticide	Yes	Yes	Inactive	na
Cyproterone acetate	427-51-0	Sigma	drug (anti-androgen)	Yes	Yes	Weak	Moderate
Daidzein	486-66-8	Santa Cruz Biotechnology	drug (estrogen)	No	No	Inactive	na
Danazol	17230-88-5	Sigma	drug (androgen)	No	No
Deltamethrin	52918-63-5	Sigma	pesticide	Yes	Yes	Inactive	Inactive
Diazinon	333-41-5	Sigma	pesticide	Yes	Yes
Dibutyl phthalate	84-74-2	Sigma	industrial	No	No
Dichlobenil	1194-65-6	Sigma	pesticide	No	No
Dichlorodiphenyltrichloroethane	50-29-3	Sigma	pesticide	No	No
Dicyclohexyl phthalate	84-61-7	Sigma	industrial	Yes	Yes
Diethyl phthalate	84-66-2	Sigma	industrial	Yes	Yes
Diethylstilbestrol	56-53-1	Sigma	drug (estrogen)	Yes	Yes
Dihexyl phthalate	84-75-3	Sigma	industrial	Yes	Yes
Dipentyl phthalate	131-18-0	Sigma	industrial	Yes	Yes
Enclomiphene hydrochloride	14158-65-7	Sigma	drug (estrogen)	No	No
Equilin	474-86-2	Sigma	drug (estrogen)	Yes	Yes
Esfenvalerate	66230-04-4	Sigma	pesticide	Yes	Yes
Estrone	53-16-7	Sigma	drug (estrogen)	Yes	Yes
Ethoprop	13194-48-4	Sigma	pesticide	Yes	Yes
Ethylparaben	120-47-8	Sigma	cosmetic	Yes	Yes
Exemestane	107868-30-4	Sigma	drug (anti-estrogen)	No	No
Fenarimol	60168-88-9	Sigma	pesticide	Yes	Yes	Inactive	Weak
Fenitrothion	122-14-5	Sigma	pesticide	Yes	Yes	na	Strong
Fenthion	55-38-9	Sigma	pesticide	Yes	Yes
Fenvalerate	51630-58-1	Sigma	pesticide	No	No
Finasteride	98319-26-7	Sigma	drug (anti-androgen)	Yes	Yes	Inactive	na
Flutamide	13311-84-7	Sigma	drug (anti-androgen)	Yes	Yes	Inactive	Moderate
Flutolanil	66332-96-5	Santa Cruz Biotechnology	pesticide	Yes	Yes
Folpet	133-07-3	Sigma	pesticide	Yes	Yes
Formestane	566-48-3	Sigma	drug (anti-aromatase)	No	No
Fulvestrant	129453-61-8	Sigma	drug (anti-estrogen)	Yes	Yes	Inactive	na
Genistein	446-72-0	Santa Cruz Biotechnology	drug (estrogen)	Yes	Yes
Hydroxyflutamide	52806-53-8	Santa Cruz Biotechnology	drug (anti-androgen)	Yes	No	na	Strong
Hydroxyprogesterone caproate	630-56-8	Sigma	drug (progestin)	No	No
Iprodione	36734-19-7	Sigma	pesticide	No	No	Inactive	na
Kaempferol	520-18-3	Sigma	drug (estrogen)	Yes	Yes
Letrozole	112809-51-5	Sigma	drug (anti-aromatase)	No	No
Levonorgestrel	797-63-7	Sigma	drug (progestin)	Yes	Yes	Strong	na
Linuron	330-55-2	Santa Cruz Biotechnology	pesticide	Yes	Yes	na	Moderate
Malathion	121-75-5	Santa Cruz Biotechnology	pesticide	Yes	Yes
Mestranol	72-33-3	Sigma	drug (estrogen)	Yes	Yes
Metalaxyl	57837-19-1	Sigma	pesticide	Yes	Yes
Methomyl	16752-77-5	Sigma	pesticide	Yes	Yes	na	Inactive
Methoxychlor	72-43-5	Sigma	pesticide	Yes	Yes	na	Weak
Metolachlor	51218-45-2	Sigma	pesticide	Yes	Yes
Metribuzin	21087-64-9	Sigma	pesticide	Yes	Yes
Mifepristone	84371-65-3	Sigma	drug (anti-progestin)	Yes	Yes	na	Strong
Mono(2-ethylhexyl) phthalate	4376-20-9	Sigma	industrial	No	No
Naringenin	67604-48-2	Sigma	drug (estrogen)	No	No
Nilutamide	63612-50-0	Sigma	drug (anti-androgen)	No	No	Inactive	Moderate
Norethindrone	68-22-4	Sigma	drug (progestin)	Yes	Yes	Strong	na
Norflurazon	27314-13-2	Sigma	pesticide	Yes	Yes
o,p'-DDT	789-02-6	Santa Cruz Biotechnology	pesticide	Yes	Yes	Inactive	Weak
Octamethylcyclotetrasiloxane	556-67-2	Sigma	industrial	Yes	Yes
Octylbicycloheptenedicarboximide	113-48-4	Sigma	pesticide	Yes	Yes
Oxamyl	23135-22-0	Sigma	pesticide	Yes	Yes
p,p'-DDD	72-54-8	Sigma	pesticide	Yes	Yes
p,p'-DDE	72-55-9	Sigma	pesticide	Yes	Yes	na	Weak
p-Dichlorobenzene	106-46-7	Sigma	pesticide	No	No
Pentachloronitrobenzene	82-68-8	Sigma	pesticide	Yes	Yes
Pentachlorophenol	87-86-5	Santa Cruz Biotechnology	industrial	Yes	Yes
Permethrin	52645-53-1	Sigma	pesticide	Yes	Yes	Inactive	na
Phenothrin	26002-80-2	Sigma	pesticide	Yes	Yes
Phosmet	732-11-6	Sigma	pesticide	Yes	Yes
Prochloraz	67747-09-5	Santa Cruz Biotechnology	pesticide	Yes	Yes	Inactive	Moderate
Procymidone	32809-16-8	Sigma	pesticide	Yes	Yes	na	Weak
Propargite	2312-35-8	Sigma	pesticide	Yes	Yes
Propiconazole	60207-90-1	Sigma	pesticide	Yes	Yes	na	Weak
Propyzamide	23950-58-5	Sigma	pesticide	Yes	Yes
Raloxifene hydrochloride	82640-04-8	Sigma	drug (estrogen)	Yes	Yes
Simazine	122-34-9	Santa Cruz Biotechnology	pesticide	Yes	Yes	na	Inactive
Spironolactone	52-01-7	Sigma	drug (anti-androgen)	Yes	Yes	na	Strong
Tamoxifen	10540-29-1	Sigma	drug (anti-estrogen)	Yes	Yes	Inactive	na
Tebuconazole	107534-96-3	Sigma	pesticide	Yes	Yes
Testosterone propionate	57-85-2	Sigma	drug (androgen)	Yes	Yes	Strong	Inactive
Tetramethrin	7696-12-0	Sigma	pesticide	Yes	Yes	Inactive	na
Triadimefon	43121-43-3	Sigma	pesticide	Yes	Yes
Tributylchlorostannane	1461-22-9	Sigma	pesticide	No	No
Trifluralin	1582-09-8	Sigma	pesticide	Yes	Yes
Vinclozolin	50471-44-8	Sigma	pesticide	Yes	Yes	na	Weak
Zearalenone	17924-92-4	Sigma	mycotoxin	Yes	Yes	na	Weak
Z-Tetrachlorvinphos	22248-79-9	Chem Service	pesticide	Yes	Yes
